# Supplementary material for: Characterization of vB_StuS_MMDA13, a Newly Discovered Bacteriophage Infecting the Agar-Degrading Species Sphingomonas turrisvirgatae
Source: MDPI journal article supplement (doi:10.3390/v12080894), 2020-08-15
Supplement: s1 [file s1]

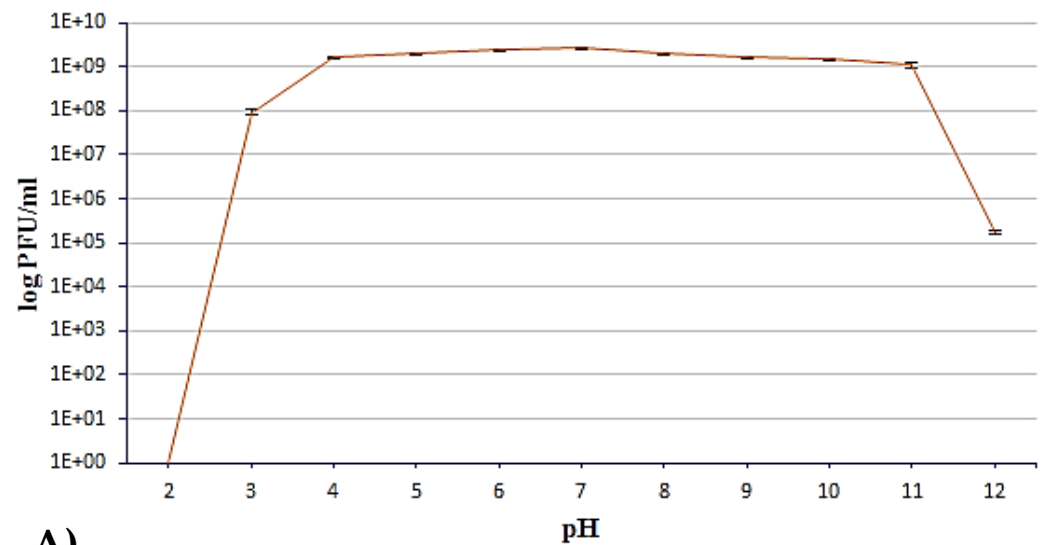

A)

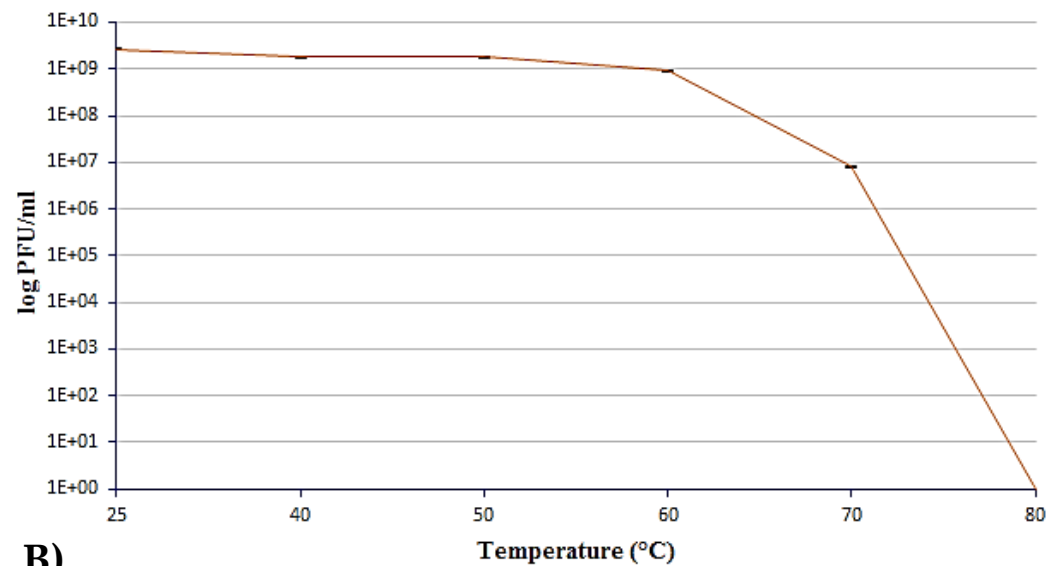

B)

**Figure S1.** pH (A) and temperature (B) stability of vB\_StuS\_MMDA13. Phages particles were incubated at 25 °C, in a pH range from 2.0 to 12.0 with intervals of 1 unit (A), or at 25, 40, 50, 60, 70 and 80 °C (B). In both cases incubation times were of 60 min, and data are the mean of three independent experiments. Vertical black bars represent one standard deviation.
