# Supplementary material for: Characterization of vB_StuS_MMDA13, a Newly Discovered Bacteriophage Infecting the Agar-Degrading Species Sphingomonas turrisvirgatae
Source: MDPI journal article supplement (doi:10.3390/v12080894), 2020-08-15
Supplement: s1 [file s1]

**Table S1.** General features of the coding regions of vB\_StuS\_MMDA13 phage. The closest homologues in INSDC databases, as resulted from a BLASTP search using “Viruses (taxid:10239)” as the organism filter, the possible conserved domains and the HHpred predicted motives are also shown. BLASTP hits of eukaryotic viruses were not taken into consideration.

| <i>gp</i> | Start (nt) | Stop (nt) | Predicted putative function                | Closest protein homolog | Query coverage (%) | ID (%) | Phage                                   | Conserved domains (from-to; accession; short name) | HHpred motif of closest homologue | Motif definition                                                | Probability (%) |
|-----------|------------|-----------|--------------------------------------------|-------------------------|--------------------|--------|-----------------------------------------|----------------------------------------------------|-----------------------------------|-----------------------------------------------------------------|-----------------|
| 1         | 85         | 516       | Terminase small subunit                    | ARB11146.1              | 95                 | 43.97  | <i>Pseudomonas</i> phage JG054          | -----                                              | 3ZQP_H                            | Terminase small subunit                                         | 99.81           |
| 2         | 513        | 1847      | Terminase large subunit                    | ALH23824.1              | 100                | 77.25  | <i>Pseudomonas</i> phage PaMx25         | 40-237; cl29365; Terminase_6 super family          | 5OE8_C                            | Large subunit terminase                                         | 100             |
| 3         | 1908       | 3587      | Portal protein                             | ARB11148.1              | 91                 | 57.45  | <i>Pseudomonas</i> phage JG054          | 312-448; cl16196; DUF4055 super family             | 2JES_G                            | Unidentified fragment of portal protein                         | 99.9            |
| 4         | 3625       | 4443      | Head protein                               | ARB11073.1              | 100                | 50.55  | <i>Pseudomonas</i> phage JG012          | -----                                              | 6B0X_c                            | Major head protein, Scaffold protein                            | 94.97           |
| 5         | 4566       | 5630      | Major phage capsid protein                 | ALH23820.1              | 100                | 71.75  | <i>Pseudomonas</i> phage PaMx25         | 172-263; cl27082; Phage_capsid super family        | 6R3A_C                            | Major capsid protein                                            | 100             |
| 6         | 5690       | 6208      | Hypothetical protein                       | ALH23819.1              | 100                | 53.18  | <i>Pseudomonas</i> phage PaMx25         | -----                                              | 5FVD_B                            | Nucleocapsid Phosphoprotein                                     | 20.43           |
| 7         | 6220       | 7002      | Peptidoglycan endopeptidase domain protein | ARB11153.1              | 96                 | 34.77  | <i>Pseudomonas</i> phage JG054          | -----                                              | 4Q4G_X                            | Peptidoglycan endopeptidase RipA                                | 93.73           |
| 8         | 7007       | 7168      | Hypothetical protein                       | QDP58552.1              | 45                 | 58.33  | Prokaryotic dsDNA virus sp.             | -----                                              | 1K1F_E                            | Breakpoint cluster region protein                               | 70.16           |
| 9         | 7172       | 7672      | Head-tail adaptor                          | ALH23816.1              | 100                | 45.98  | <i>Pseudomonas</i> phage PaMx25         | -----                                              | 1XN8_A                            | Hypothetical protein yqbG                                       | 97.54           |
| 10        | 7672       | 8076      | Head completion protein                    | QDB70185.1              | 34                 | 39.13  | <i>Salmonella</i> virus KFS-SE2         | -----                                              | 1K0H_A                            | gpFII                                                           | 96.49           |
| 11        | 8073       | 8540      | Tail completion protein                    | ALH23585.1              | 94                 | 34.25  | <i>Pseudomonas</i> phage PaMx42         | -----                                              | 2L25_A                            | Uncharacterized protein                                         | 99.91           |
| 12        | 8546       | 10387     | Major tail protein                         | AXC34265.1              | 85                 | 48.22  | <i>Escherichia</i> phage Halfdan        | -----                                              | 5NGJ_B                            | Tail tube protein                                               | 99.47           |
| 13        | 10463      | 10906     | Tail fiber protein                         | QDP56586.1              | 100                | 48.30  | Prokaryotic dsDNA virus sp.             | -----                                              | 2OB9_A                            | Tail assembly chaperone                                         | 94.94           |
| 14        | 10918      | 11283     | Tail chaperonin                            | AXC34263.1              | 90                 | 44.07  | <i>Escherichia</i> phage Halfdan        | -----                                              | 5Z2H_A                            | <i>Dictyostelium discoideum</i> mitochondrial calcium uniporter | 50.19           |
| 15        | 11252      | 11695     | Head to tail connection protein (Neck)     | CUS06475.1              | 95                 | 42.55  | <i>Acinetobacter</i> phage vB_AbaS_Loki | 7-56; pfam04883; HK97-gp10_like                    | 4N3Y_A                            | Rab5 GDP/GTP exchange factor, Rab                               | 34.75           |
| 16        | 11699      | 14569     | Phage tail tape measure protein            | AEX56104.1              | 63                 | 29.13  | <i>Burkholderia</i> phage KL1           | 214-320; cl06039; TMP_2 super family               | 5IJO_T                            | Nuclear pore complex protein Nup155                             | 94.67           |

|    |       |       |                                                |            |     |       |                                           |                                                                                          |        |                                                                  |       |
|----|-------|-------|------------------------------------------------|------------|-----|-------|-------------------------------------------|------------------------------------------------------------------------------------------|--------|------------------------------------------------------------------|-------|
| 17 | 14574 | 15512 | Hypothetical protein                           | AEX56075.1 | 99  | 31.23 | <i>Burkholderia</i> phage KL1             | -----                                                                                    | 1J3M_B | The conserved hypothetical protein TT1751                        | 48.86 |
| 18 | 15512 | 16504 | Structural phage protein                       | CAO77826.1 | 97  | 26.91 | <i>Pseudomonas</i> virus Yua              | -----                                                                                    | 1J3M_B | The conserved hypothetical protein TT1751                        | 57.29 |
| 19 | 16504 | 18198 | Distal tail protein                            | AEX56105.1 | 94  | 31.29 | <i>Burkholderia</i> phage KL1             | -----                                                                                    | 6F2M_C | Distal tail protein                                              | 96.5  |
| 20 | 18195 | 19004 | Hypothetical protein                           | AEX56106.1 | 100 | 41.39 | <i>Burkholderia</i> phage KL1             | 178-262; cl10710; Phage_BR0599 super family) 31-268; cl37077; phg_TIGR02218 super family | 6J0M_C | Pvc8                                                             | 51.19 |
| 21 | 19004 | 21859 | Tail protein                                   | AEX56107.1 | 82  | 39.20 | <i>Burkholderia</i> phage KL1             | -----                                                                                    | 3CDD_E | Prophage MuSo2, 43 kDa tail                                      | 96.28 |
| 22 | 21856 | 22746 | Hypothetical protein                           | AGH31476.1 | 37  | 30.00 | <i>Loktanella</i> phage pCB2051-A         | -----                                                                                    | 4OUS_A | Caprin-2                                                         | 67.21 |
| 23 | 22746 | 23798 | Tail assembly protein                          | ATS92205.1 | 99  | 31.84 | <i>Stenotrophomonas</i> phage DLP4        | -----                                                                                    | 2HB0_A | CFA/I fimbrial subunit E                                         | 20.75 |
| 24 | 23795 | 25357 | Hypothetical protein                           | AEY69562.1 | 15  | 38.55 | <i>Burkholderia</i> phage vB_BceS_AH2     | -----                                                                                    | 4UWA_D | Ryanodine receptor 1                                             | 99.85 |
| 25 | 25357 | 25521 | Tail assembly protein                          | AHB12066.1 | 94  | 37.25 | <i>Xylella</i> phage Sano                 | -----                                                                                    | 2QZB_B | Uncharacterized protein yfeY                                     | 25.4  |
| 26 | 27851 | 25626 | DNA polymerase                                 | ARB11098.1 | 98  | 61.41 | <i>Pseudomonas</i> phage JG012            | -----                                                                                    | 5MDN_B | DNA polymerase (E,C,2,7,7, 7)                                    | 100   |
| 27 | 28034 | 27903 | DNA-directed RNA polymerase                    | AUR82457.1 | 60  | 46.15 | <i>Vibrio</i> phage 1.024.O_10N.261.45.F8 | -----                                                                                    | 4QIW_W | DNA-directed RNA polymerase (E,C,2,7,7,6)                        | 98.49 |
| 28 | 29026 | 28034 | DNA polymerase III beta subunit                | ARB11176.1 | 96  | 58.81 | <i>Pseudomonas</i> phage JG054            | -----                                                                                    | 3T0P_B | DNA polymerase III, beta subunit                                 | 100   |
| 29 | 29226 | 29020 | Hypothetical protein                           | No match   |     |       |                                           | -----                                                                                    | 2CYU_A | 2-oxoglutarate dehydrogenase multienzyme complex (E,C,2,3,1,61)  | 59.88 |
| 30 | 30200 | 29223 | Queuosine tRNA ribosyltransferase (DpdA)       | AND74884.1 | 99  | 70.06 | <i>Pseudomonas</i> phage NP1              | -----                                                                                    | 2ASH_D | Queuine tRNA-ribosyltransferase (E,C,2,4,2,29)                   | 100   |
| 31 | 31106 | 30219 | GTP cyclohydrolase I (FolE)                    | AND74886.1 | 89  | 60.37 | <i>Pseudomonas</i> phage NP1              | -----                                                                                    | 4UQF_C | GTP cyclohydrolase 1 (E,C,3,5,4,16)                              | 100   |
| 32 | 31573 | 31106 | 6-carboxytetrahydropterin synthase (QueD-like) | AGC35897.1 | 96  | 52.35 | <i>Rhizobium</i> phage RHEph06            | -----                                                                                    | 2G64_A | Putative 6-pyruvoyl tetrahydrobiopterin synthase (E.C.4.2.3.12)  | 100   |
| 33 | 31872 | 31576 | Archeosine synthase QueF-Like                  | QDP52302.1 | 92  | 43.96 | Prokaryotic dsDNA virus sp.               | -----                                                                                    | 5K0P_G | Archeosine synthase QueF-Like                                    | 91.16 |
| 34 | 32261 | 31848 | Hypothetical protein                           | QDP52303.1 | 91  | 46.92 | Prokaryotic dsDNA virus sp.               | -----                                                                                    | 6OHT_A | 3-beta-hydroxysteroid-Delta(8), Delta(7)-isomerase (E,C,5,3,3,5) | 11.85 |

|    |       |       |                                               |            |     |       |                                          |       |         |                                                   |       |
|----|-------|-------|-----------------------------------------------|------------|-----|-------|------------------------------------------|-------|---------|---------------------------------------------------|-------|
| 35 | 33046 | 32261 | 7-cyano-7-deazaguanine synthase (QueC-like)   | AGC35898.1 | 96  | 56.42 | <i>Rhizobium</i> phage RHEph06           | ----- | 3BL5_F  | Queuosine biosynthesis protein queC (E,C,3,5,-,-) | 99.93 |
| 36 | 33759 | 33046 | 7-carboxy-7-deazaguanine synthase (QueE-like) | ALH23789.1 | 99  | 53.36 | <i>Pseudomonas</i> phage PaMx25          | ----- | 4NJH_B  | 7-carboxy-7-deazaguanine synthase (E,C,4,3,99,3)  | 99.92 |
| 37 | 34428 | 33868 | Hypothetical protein                          | ALH23788.1 | 52  | 73.20 | <i>Pseudomonas</i> phage PaMx25          | ----- | 3JCJ_f  | Protein/RNA Complex                               | 93.94 |
| 38 | 35227 | 34505 | Hypothetical protein                          | ARB11183.1 | 100 | 42.69 | <i>Pseudomonas</i> phage JG054           | ----- | 2NP3_B  | Putative TetR-family regulator                    | 81.33 |
| 39 | 35579 | 35229 | Hypothetical protein                          | QDP53518.1 | 50  | 41.67 | Prokaryotic dsDNA virus sp.              | ----- | 5W1S_N  | DNA-directed RNA polymerase subunit alpha         | 81.09 |
| 40 | 35697 | 35569 | Hypothetical protein                          | No match   |     |       |                                          | ----- | 4D7S_B  | STHK_CNBD_CGMP                                    | 68.16 |
| 41 | 37681 | 35756 | Superfamily II DNA helicase                   | ARB11186.1 | 96  | 58.27 | <i>Pseudomonas</i> phage JG054           | ----- | 6JDE_A  | Putative DNA repair helicase RadD                 | 100   |
| 42 | 38649 | 37678 | Exonuclease RecB                              | ARB11187.1 | 97  | 58.82 | <i>Pseudomonas</i> phage JG054           | ----- | 3SYY_A  | Exonuclease                                       | 99.3  |
| 43 | 39739 | 38774 | Hypothetical protein                          | AND74897.1 | 52  | 65.70 | <i>Pseudomonas</i> phage NP1             | ----- | 1NY4_A  | 30S ribosomal protein S28E                        | 51.51 |
| 44 | 40497 | 39772 | RecA ATPase                                   | AND74898.1 | 100 | 75.10 | <i>Pseudomonas</i> phage NP1             | ----- | 1N0W_A  | DNA repair protein RAD51 homolog                  | 99.41 |
| 45 | 41435 | 40497 | ATP-dependent DNA ligase                      | QDB70915.1 | 97  | 45.63 | <i>Pseudomonas</i> virus PBPA162         | ----- | 1FVI_A  | PBCV-1 DNA ligase (E,C,6,5,1,-)                   | 100   |
| 46 | 41809 | 41432 | Hypothetical protein                          | No match   |     |       |                                          | ----- |         |                                                   |       |
| 47 | 42509 | 41784 | Primosomal protein                            | QFR59661.1 | 75  | 39.89 | <i>Pseudomonas</i> phage Quinobequin-P09 | ----- | 2D7E_B  | Primosomal protein N'(E,C,3,6,1,-)                | 92.76 |
| 48 | 42865 | 42506 | Ribonuclease H like protein                   | ARB11119.1 | 98  | 45.30 | <i>Pseudomonas</i> phage JG012           | ----- | 4IBN_A  | Ribonuclease H (E,C,3,1,26,4)                     | 98.89 |
| 49 | 43431 | 42973 | Host-nuclease inhibitor                       | ALH23774.1 | 92  | 43.97 | <i>Pseudomonas</i> phage PaMx25          | ----- | 2P2U_A  | Host-nuclease inhibitor protein Gam, putative     | 95.55 |
| 50 | 44179 | 43499 | Nucleotide pyrophosphohydrolase               | ARK07441.1 | 82  | 39.04 | <i>Sphingobium</i> phage Lacusarx        | ----- | 4QGP_B  | Pyrophosphatase                                   | 98.92 |
| 51 | 46673 | 44244 | Primase                                       | ARB11197.1 | 99  | 56.01 | <i>Pseudomonas</i> phage JG054           | ----- | 6A9W_A  | Primase                                           | 100   |
| 52 | 46869 | 46735 | Hypothetical protein                          | No match   |     |       |                                          | ----- | 6Q6G_O  | Cell division cycle protein 20                    | 50.9  |
| 53 | 47759 | 47061 | Hypothetical protein                          | No match   |     |       |                                          | ----- | 1P2X_A  | Ras GTPase-activating-like protein                | 62.77 |
| 54 | 48946 | 49089 | Hypothetical protein                          | No match   |     |       |                                          | ----- | 6OD1_A  | Regulator of RpoS, Anti-adaptor protein           | 52.13 |
| 55 | 49140 | 49322 | Hypothetical protein                          | No match   |     |       |                                          | ----- | 2N7R_A  | Nicastrin                                         | 66.19 |
| 56 | 49324 | 49458 | Hypothetical protein                          | No match   |     |       |                                          | ----- | 6HIZ_DE | Uncharacterized protein, uS3m, UNK/RNA Complex    | 84    |
| 57 | 49463 | 49711 | Transcriptional regulator                     | No match   |     |       |                                          | ----- | 4ZA6_A  | QsdR                                              | 95.48 |

|    |       |       |                                 |            |    |       |                                           |       |         |                                                            |       |
|----|-------|-------|---------------------------------|------------|----|-------|-------------------------------------------|-------|---------|------------------------------------------------------------|-------|
| 58 | 49708 | 49920 | Hypothetical protein            | No match   |    |       |                                           | ----- | 4AYB_A  | DNA-directed RNA polymerase (E,C,2,7,7,6)                  | 43.24 |
| 59 | 50046 | 50546 | Hypothetical protein            | ARB11185.1 | 97 | 45.78 | <i>Pseudomonas</i> phage JG054            | ----- | 2OUT_A  | Mu-like prophage FluMu protein gp35                        | 93.19 |
| 60 | 50923 | 51063 | Hypothetical protein            | No match   |    |       |                                           | ----- | 2XJY_B  | Rhombotin-2, LIM domain-binding protein 1                  | 55.47 |
| 61 | 51090 | 51563 | Hypothetical protein            | No match   |    |       |                                           | ----- | 4UC0_A  | Purine nucleoside phosphorylase                            | 53.72 |
| 62 | 51563 | 52039 | Hypothetical protein            | AEX55965.1 | 32 | 43.64 | <i>Pseudomonas</i> virus PMG1             | ----- | 6GAW_B5 | Mitochondrial ribosomal protein L12, Mitochondrial         | 78.86 |
| 63 | 52039 | 52251 | Hypothetical protein            | QDP53750.1 | 68 | 50.00 | Prokaryotic dsDNA virus sp.               | ----- | 1QHK_A  | Ribonuclease HI (E,C,3,1,26,4)                             | 74.4  |
| 64 | 52447 | 52668 | Hypothetical protein            | No match   |    |       |                                           | ----- | 6K15_E  | RSC7, Chromatin structure-remodeling complex protein       | 51.94 |
| 65 | 52665 | 52892 | Hypothetical protein            | No match   |    |       |                                           | ----- | 3JXO_A  | TrkA-N domain protein                                      | 75.14 |
| 66 | 52879 | 53490 | Hypothetical protein            | QAX97590.1 | 95 | 33.58 | <i>Enterococcus</i> phage EfsSzw-1        | ----- | 6SGA_Fd | Mitochondrial ribosome, assembly intermediate, translation | 54.23 |
| 67 | 53493 | 53759 | Hypothetical protein            | No match   |    |       |                                           | ----- | 6MCJ_A  | Putative orange carotenoid-binding protein                 | 49.93 |
| 68 | 53832 | 54968 | Hypothetical protein            | ASE99804.1 | 42 | 31.52 | Uncultured virus                          | ----- | 6DM9_B  | DHD127_A, DHD127_B                                         | 50.34 |
| 69 | 54965 | 55180 | Hypothetical protein            | ARM66686.1 | 67 | 39.58 | <i>Lactococcus</i> phage AM4              | ----- | 3M9D_I  | Coil coil domain, inter domain                             | 49.13 |
| 70 | 55167 | 55505 | Hypothetical protein            | QBQ72133.1 | 57 | 35.38 | <i>Brevundimonas</i> phage vB_BsubS-Delta | ----- | 1Y7T_A  | Malate dehydrogenase (E,C,1,1,1,37)                        | 41.86 |
| 71 | 55483 | 55962 | Hypothetical protein            | No match   |    |       |                                           | ----- | 4OTN_A  | Eukaryotic translation initiation factor 2-alpha           | 65.08 |
| 72 | 56139 | 56351 | Antitermination protein         | VCU43734.1 | 72 | 29.09 | <i>Escherichia</i> virus vB_Eco_mar003J3  | ----- | 4MO1_A  | Antitermination protein Q                                  | 96.92 |
| 73 | 56360 | 56806 | Nucleotide pyrophosphohydrolase | BBA65581.1 | 83 | 51.13 | <i>Xanthomonas</i> phage XacN1            | ----- | 4QGP_B  | Pyrophosphatase                                            | 99.15 |
| 74 | 56803 | 56982 | Hypothetical protein            | No match   |    |       |                                           | ----- | 6G2J_S  | NADH-ubiquinone oxidoreductase chain 3 (E,C,1,6,5,3)       | 48.47 |
| 75 | 56975 | 57358 | Hypothetical protein            | QDP54416.1 | 51 | 47.69 | Prokaryotic dsDNA virus sp.               | ----- | 2O35_B  | Hypothetical protein DUF1244                               | 47.95 |

|    |       |       |                                    |            |     |       |                                        |       |        |                                                       |       |
|----|-------|-------|------------------------------------|------------|-----|-------|----------------------------------------|-------|--------|-------------------------------------------------------|-------|
| 76 | 57358 | 57936 | Hypothetical protein               | No match   |     |       |                                        | ----- | 6QZL_D | FAM83B                                                | 74.8  |
| 77 | 57933 | 58133 | Hypothetical protein               | ADU79191.1 | 39  | 38.46 | <i>Enterobacter</i> phage EcP1         | ----- | 3M05_A | Uncharacterized protein<br>PEPE_1480                  | 87.21 |
| 78 | 58133 | 58606 | Endonuclease                       | QDB70880.1 | 98  | 43.75 | <i>Pseudomonas</i> virus PBPA162       | ----- | 1OB8_B | Holliday-junction<br>resolvase                        | 99.3  |
| 79 | 58606 | 59034 | Thiol dioxygenase                  | AID18361.1 | 66  | 53.19 | <i>Rhizobium</i> phage vB_RleM_PPF1    | ----- | 4WVZ_B | Thiol dioxygenase                                     | 97.33 |
| 80 | 59036 | 59239 | Hypothetical protein               | No match   |     |       |                                        | ----- | 1IIO_A | Conserved hypothetical<br>protein MTH865              | 56.23 |
| 81 | 59229 | 59615 | Hypothetical protein               | No match   |     |       |                                        | ----- | 3NH6_A | ATP-binding cassette sub-<br>family B member          | 98.43 |
| 82 | 59612 | 59875 | Hypothetical protein               | ALY08076.1 | 37  | 39.39 | <i>Bacillus</i> phage vB_BhaS-171      | ----- | 5IJO_T | Nuclear pore complex<br>protein Nup155                | 51.14 |
| 83 | 59945 | 61462 | UvrD superfamily I DNA<br>helicase | ARB11211.1 | 100 | 62.57 | <i>Pseudomonas</i> phage JG054         | ----- | 4C2T_D | DNA helicase II<br>(E,C,3,6,4,12)                     | 100   |
| 84 | 61473 | 61691 | Hypothetical protein               | No match   |     |       |                                        | ----- | 3MSH_A | Hepatitis B virus X-<br>interacting protein           | 55.43 |
| 85 | 61849 | 62481 | Endolysin                          | AJG41882.1 | 71  | 39.74 | <i>Acinetobacter</i> phage RL-2015     | ----- | 3NE0_A | Resuscitation promoting<br>factor Interacting Protein | 98.85 |
| 86 | 62478 | 62732 | Holin                              | APZ81838.1 | 86  | 87.67 | <i>Erythrobacter</i> phage vB_EliS_R6L | ----- | 2O6K_B | UPF0346 protein MW1311                                | 63.93 |
| 87 | 62725 | 63105 | Rz protein                         | No match   |     |       |                                        | ----- | 5LQZ_V | ATP synthase subunit f,<br>ATP                        | 93.62 |
| 88 | 62993 | 63283 | Rz1 protein                        | No match   |     |       |                                        | ----- | 4IMM_B | Outer membrane<br>assembly lipoprotein<br>YfgL        | 91.68 |
| 89 | 63213 | 63743 | Peptidoglycan endopeptidase        | No match   |     |       |                                        | ----- | 4Q4G_X | Peptidoglycan<br>endopeptidase RipA                   | 90.83 |
