# Supplementary material for: Characterization of vB_StuS_MMDA13, a Newly Discovered Bacteriophage Infecting the Agar-Degrading Species Sphingomonas turrisvirgatae
Source: MDPI journal article supplement (doi:10.3390/v12080894), 2020-08-15
Supplement: s1 [file s1]

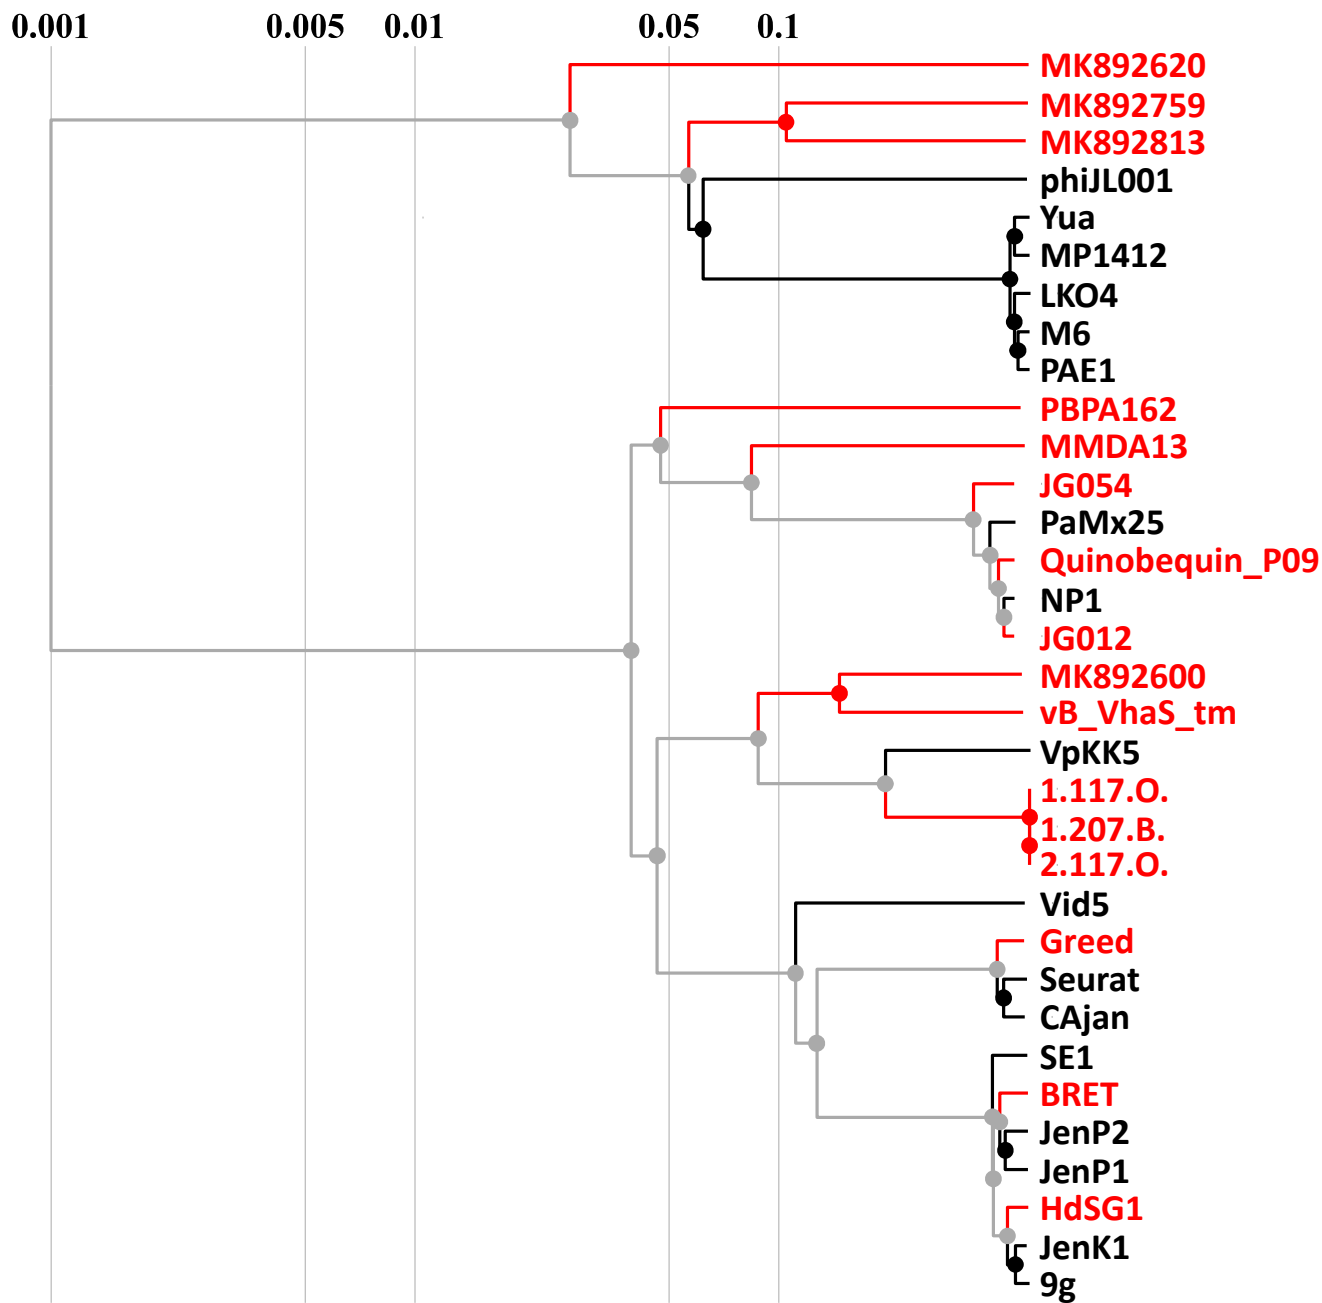

**Figure S2.** Proteomic phylogenetic tree based on a genome-wide similarity of viral genomes computed by TBLASTX and obtained by ViPTree web-server analysis. Branches and phage names of bacteriophages currently classified by ICTV (last accessed on 30 July 2020) are coloured in black.
